# Supplementary material for: Ferredoxin reductase and p53 are necessary for lipid homeostasis and tumor suppression through the ABCA1–SREBP pathway
Source: PubMed Central journal article supplement (PMC8933276; doi:10.1038/s41388-021-02100-0), 2022-02-04
Supplement: 41388_2021_2100_MOESM1_ESM.pdf [file 41388_2021_2100_MOESM1_ESM.pdf]

## Supplementary Figure S1

A

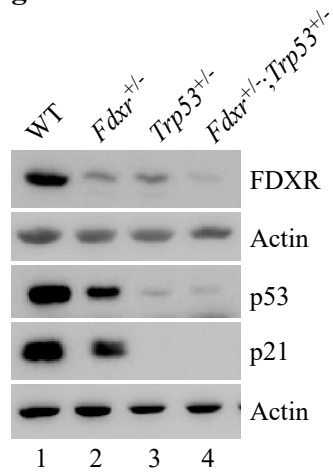

B

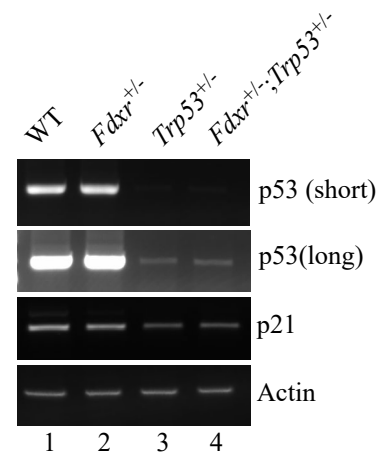

C

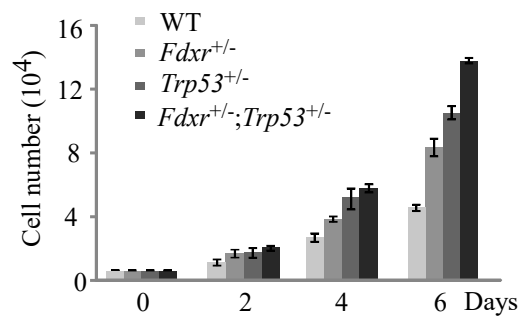

### Supplementary Figure S1. Lack of *Fdxr*, *Trp53* or both promotes cell growth

- (A) The levels of FDXR, p53, p21, and Actin were measured by western blotting in WT, *Fdxr*<sup>+/-</sup>, *Trp53*<sup>+/-</sup> or *Fdxr*<sup>+/-</sup>;*Trp53*<sup>+/-</sup> MEFs.
- (B) The levels of p53, p21 and actin transcripts were measured by RT-PCR in WT, *Fdxr*<sup>+/-</sup>, *Trp53*<sup>+/-</sup> or *Fdxr*<sup>+/-</sup>;*Trp53*<sup>+/-</sup> MEFs.
- (C) The number of WT, *Fdxr*<sup>+/-</sup>, *Trp53*<sup>+/-</sup>, and *Fdxr*<sup>+/-</sup>;*Trp53*<sup>+/-</sup> MEFs was measured over a 6-day period. The number was presented as mean ± SD from three separate experiments.

## Supplementary Figure S2

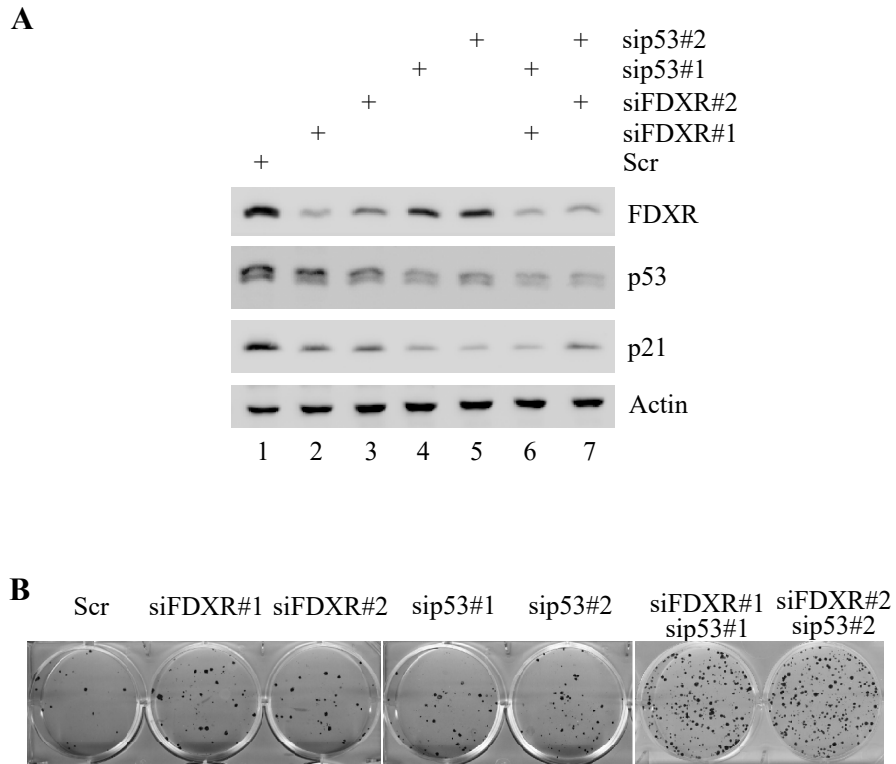

### Supplementary Figure S2. A deficiency in *FDXR*, *p53* or both promotes cell growth in HepG2 cells

- (A)** HepG2 cells were transfected with scrambled siRNA (Scr) or siRNAs against *FDXR* and/or *p53* for 72 h. Cell lysates were collected and subjected to western blot analysis with antibodies against *FDXR*, *p53*, *p21* and Actin.
- (B)** Colony formation assay was performed with HepG2 cells transfected with scrambled siRNA (Scr) or siRNAs against *FDXR* and/or *p53*.

### Supplementary Figure S3

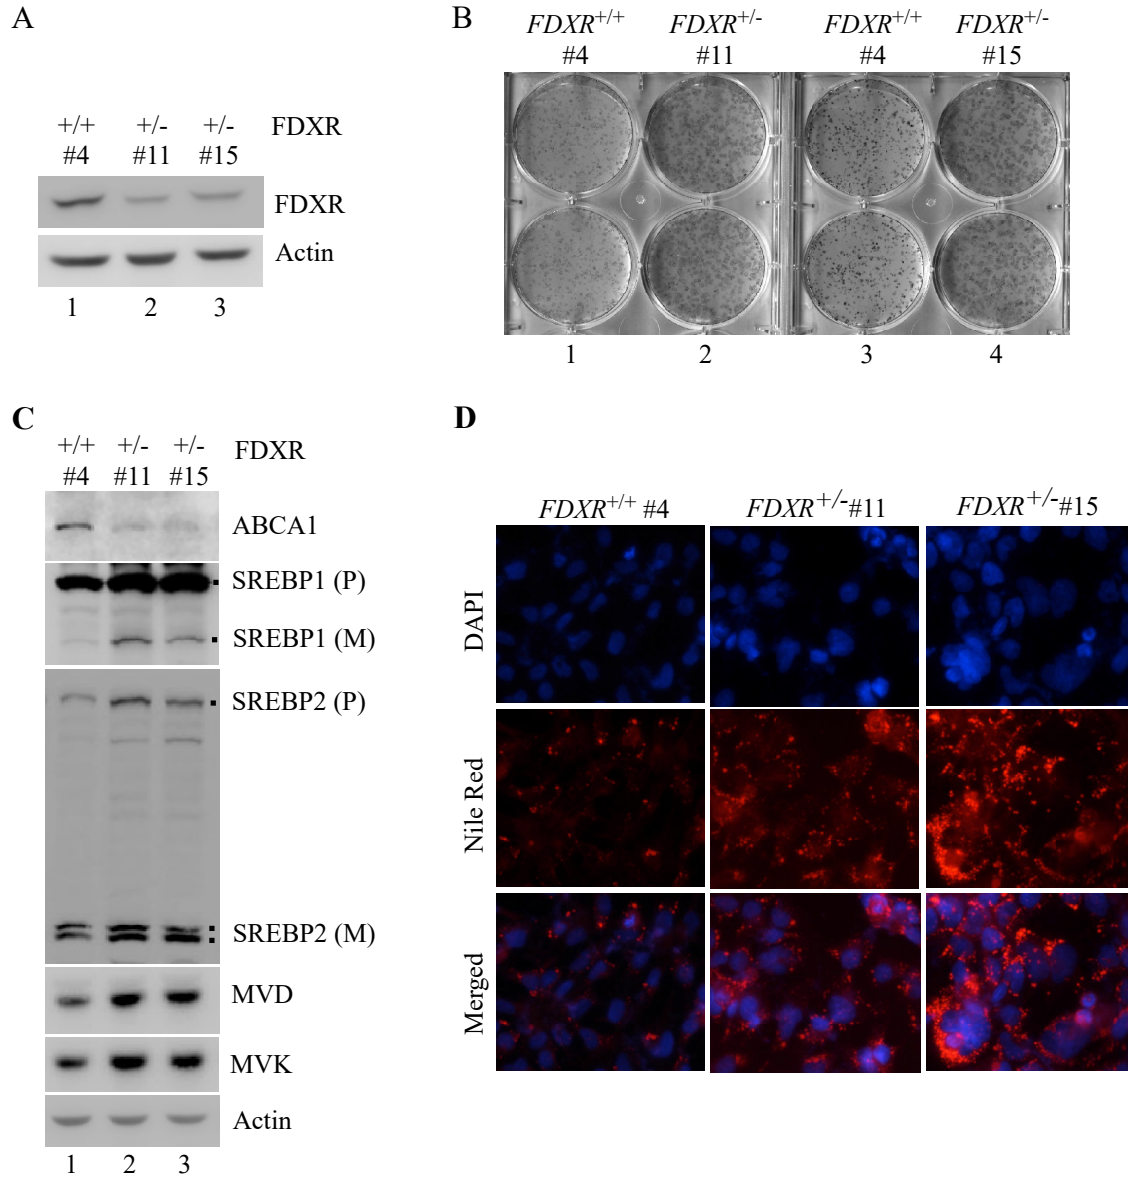

**Supplementary Figure S3. Deficiency in *FDXR* promotes cell growth in p53-null Hep3B cells.**

- (A) The levels of FDXR and Actin were measured by western blotting in isogenic control and *FDXR*<sup>+/-</sup> Hep3B cells (clone#11 and #15).
- (B) Colony formation assay was performed with isogenic control or *FDXR*<sup>+/-</sup> Hep3B (clone#11 and #15) cells.
- (C) The levels of ABCA1, SREBP1/2, MVD, MVK, and Actin were measured in isogenic control and *FDXR*<sup>+/-</sup> Hep3B (clone#11 and #15) cells cultured in serum-free media for 4 h.
- (D) Isogenic control and *FDXR*<sup>+/-</sup> Hep3B (clone#11 and #15) cells were cultured in serum-free media for 4 h and then followed by Nile Red staining. DAPI was used to stain nuclei.

## Supplementary Figure S4

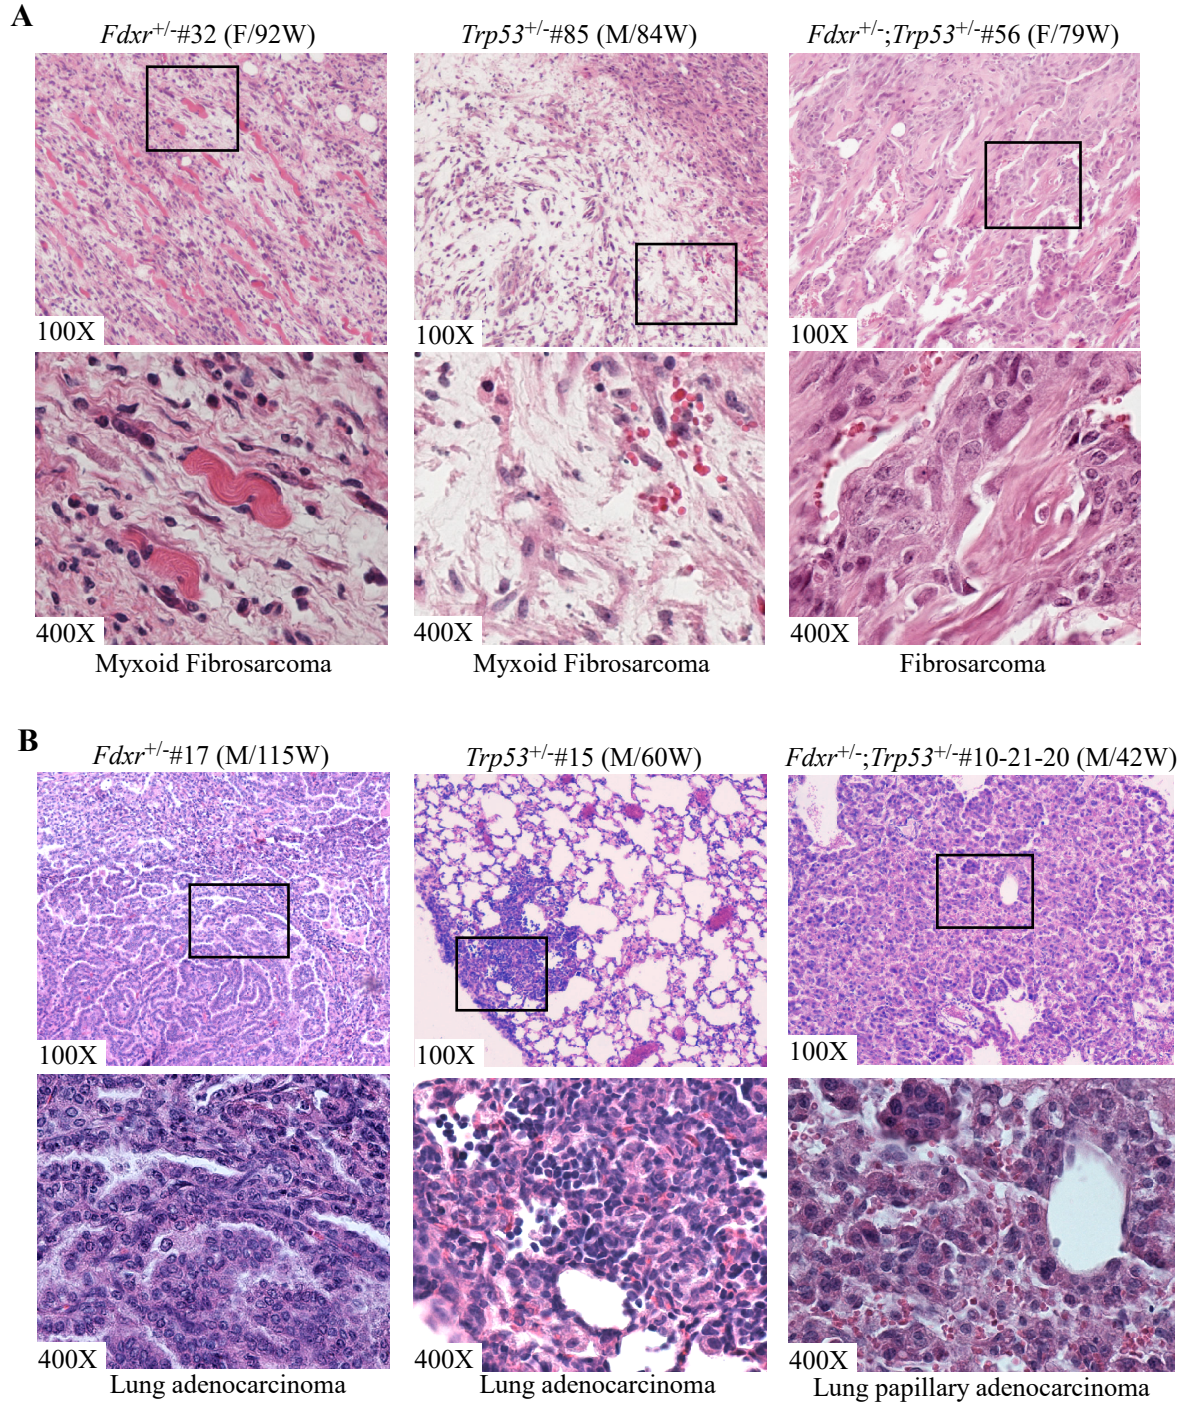

**Supplementary Figure S4. Mice deficient in *Fdcr*, *Trp53*, or both are prone to spontaneous tumors.** Representative images of H&E-stained fibrosarcoma (A) and lung adenocarcinoma (B) in *Fdcr*<sup>+/-</sup>, *Trp53*<sup>+/-</sup> or *Fdcr*<sup>+/-</sup>;*Trp53*<sup>+/-</sup> mice.
