# Supplementary material for: Ferredoxin reductase and p53 are necessary for lipid homeostasis and tumor suppression through the ABCA1–SREBP pathway
Source: PubMed Central journal article supplement (PMC8933276; doi:10.1038/s41388-021-02100-0), 2022-02-04
Supplement: 41388_2021_2100_MOESM2_ESM.pdf [file 41388_2021_2100_MOESM2_ESM.pdf]

**Supplementary Table S1: Wild-type (WT) mice - survival time, tumor spectrum and other abnormalities (n=32)**

| ID | Gender | Survival (Wks) | Tumor                                                     | Other abnormalities                |
|----|--------|----------------|-----------------------------------------------------------|------------------------------------|
| 5  | F      | 134            | No                                                        | No                                 |
| 7  | F      | 117            | No                                                        | No                                 |
| 16 | F      | 100            | No                                                        | No                                 |
| 22 | F      | 109            | No                                                        | No                                 |
| 25 | F      | 109            | No                                                        | No                                 |
| 44 | F      | 90             | No                                                        | No                                 |
| 55 | F      | 104            | T-LBL in Liver, thymus, salivary gland, spleen and kidney | No                                 |
| 64 | F      | 120            | No                                                        | No                                 |
| 2  | M      | 127            | No                                                        | No                                 |
| 3  | M      | 117            | No                                                        | Chronic hepatitis                  |
| 11 | M      | 111            | N/A                                                       | Found dead                         |
| 12 | M      | 127            | No                                                        | No                                 |
| 13 | M      | 127            | No                                                        | Normal                             |
| 20 | M      | 122            | No                                                        | Normal                             |
| 23 | M      | 122            | No                                                        | Normal                             |
| 26 | M      | 127            | No                                                        | Chronic hepatitis and sialadenitis |
| 34 | M      | 124            | DLBCL in liver, spleen, kidney and pancreas               | No                                 |
| 37 | M      | 134            | No                                                        | No                                 |
| 62 | M      | 128            | No                                                        | No                                 |
| 42 | M      | 111            | N/A                                                       | Found dead                         |
| 43 | M      | 107            | N/A                                                       | Found dead                         |
| 45 | M      | 133            | No                                                        | No                                 |
| 46 | M      | 117            | N/A                                                       | Found dead                         |
| 49 | M      | 117            | No                                                        | No                                 |
| 50 | M      | 113            | T-LBL in Thymus; DLBCL in spleen and intestine            | No                                 |
| 52 | M      | 101            | N/A                                                       | Found dead                         |
| 56 | M      | 117            | DLBCL in spleen, kidney and pancreas                      | No                                 |
| 59 | M      | 119            | DLBCL in liver, spleen                                    | Enlarged lymph mesentery nodes     |
| 65 | M      | 106            | No                                                        | No                                 |
| 69 | M      | 102            | DLBCL in lung, spleen and kidney                          | Enlarged spleen                    |
| 70 | M      | 103            | No                                                        | Enlarged thymus                    |
| 71 | M      | 90             | No                                                        | No                                 |

T-LBL: T-cell lymphoblastic lymphoma; DLBCL: Diffuse large B-cell lymphoma; N/A: not applicable

\*WT mice were from published studies (Zhang et al, 2017, Genes & Dev, 31:1243-56; Zhang, et al, 2019, Oncogene, 38:6256-69)

**Supplementary Table S2: *FdXR*<sup>+/-</sup> mice - survival time, tumor spectrum and other abnormalities (n=31)**

| ID | Gender | Survival (Wks) | Tumor                                                                                    | Other abnormalities                                                        |
|----|--------|----------------|------------------------------------------------------------------------------------------|----------------------------------------------------------------------------|
| 1  | M      | 123            | DLBCL in thymus, salivary, lung, liver, pancreas, and spleen                             | Liver steatosis and hepatitis                                              |
| 6  | M      | 119            | Not applicable                                                                           | Found dead                                                                 |
| 14 | M      | 100            | Hepatocellular carcinoma; Spleen angiosarcoma                                            | Liver steatosis                                                            |
| 17 | M      | 115            | Lung adenocarcinoma                                                                      | Liver steatosis; Thymus hyperplasia                                        |
| 18 | M      | 98             | Not applicable                                                                           | Found dead                                                                 |
| 24 | M      | 116            | Lung carcinoma                                                                           | Liver necrosis and hepatitis                                               |
| 27 | M      | 115            | T-LBL in thymus                                                                          | Liver hepatitis; Lung chronic inflammation                                 |
| 21 | M      | 114            | Liver hemangioma; DLBCL in adrenal gland and spleen                                      | EMH in spleen                                                              |
| 33 | M      | 112            | T-LBL in thymus, kidney and spleen                                                       | No                                                                         |
| 31 | M      | 102            | T-LBL in thymus, salivary, kidney, pancreas and intestine                                | No                                                                         |
| 36 | M      | 125            | Liver angiosarcoma                                                                       | Mildly enlarged spleen                                                     |
| 38 | M      | 104            | No                                                                                       | Liver steatosis; large cell dysplasia in liver and spleen                  |
| 57 | M      | 106            | No                                                                                       | Liver steatosis; Kidney inflammation                                       |
| 60 | M      | 115            | Liver hemangioma; Lung adenocarcinoma                                                    | Liver steatosis and chronic hepatitis                                      |
| 15 | F      | 102            | T-LBL in Thymus; Spleen angiosarcoma                                                     | Large cell hyperplasia in liver                                            |
| 32 | F      | 92             | Fibrosarcoma and lymphoma on left shoulder; lymphoma in salivary gland, spleen and lung  | Liver chronic hepatitis                                                    |
| 63 | F      | 86             | DLBCL in liver, thymus, spleen and pancreas                                              | Liver steatosis and hepatitis; Lymphocytic sialadenitis; Endometrial polyp |
| 73 | F      | 68             | DLBCL in spleen and in kidney                                                            | Lymphocytic sialadenitis; Spleen hyperplasia                               |
| 40 | F      | 100            | DLBCL in spleen                                                                          | Liver steatosis                                                            |
| 41 | F      | 39             | Myeloid sarcoma in spleen; DLBCL in liver, spleen, kidney and intestine; Ovarian adenoma | Liver chronic hepatitis                                                    |
| 47 | F      | 60             | No                                                                                       | Liver steatosis                                                            |
| 48 | F      | 100            | High grade sarcoma in liver, ovary, uterus, and abdomen; DLBCL in spleen                 | Hepatitis                                                                  |
| 35 | F      | 77             | T-LBL in thymus                                                                          | Liver steatosis<br>Large cell hyperplasia                                  |
| 51 | F      | 113            | Thymus adenoma; DLBCL in salivary gland                                                  | Liver steatosis and hepatitis                                              |
| 53 | F      | 90             | DLBCL in liver, thymus, lung, pancreas and ovary                                         | Liver steatosis                                                            |
| 54 | F      | 102            | Lung adenocarcinoma                                                                      | Liver steatosis                                                            |
| 58 | F      | 97             | Hepatocellular carcinoma; Spleen myeloid sarcoma, lymphoma and hemangioma                | Liver steatosis; Intestine appendiceal epiploica                           |
| 29 | F      | 108            | Salivary gland and kidney plasmacytoma                                                   | Thymus hyperplasia                                                         |
| 61 | F      | 100            | DLBCL in kidney                                                                          | Thymus, spleen hyperplasia                                                 |
| 4  | F      | 114            | DLBCL in thymus, kidney, ovary, pancreas, shoulder, and abdominal lymph nodes.           | Liver steatosis with inflammation; pancreas islet cell hyperplasia         |
| 19 | F      | 116            | DLBCL in liver, pancreas, spleen, kidney, and ovary                                      | Hepatitis and Pneumonia                                                    |

T-LBL: T-cell lymphoblastic lymphoma; DLBCL: Diffuse large B-cell lymphoma; EMH: extramedullary hematopoiesis  
 FDXR<sup>+/-</sup> mice were from published studies (Zhang et al, 2017, *Genes & Dev*, 31:1243-56; Zhang et al, 2019, *Oncogene*, 38:6256-69)

**Supplementary Table S3:** *p53*<sup>+/-</sup> mice - survival time, tumor spectrum and other abnormalities (n=24)

| ID     | Gender | Survival (Wks) | Tumor                              | Other abnormalities                           |
|--------|--------|----------------|------------------------------------|-----------------------------------------------|
| 15     | M      | 60             | Adenocarcinoma and liposarcoma     | Liver inflammation                            |
| 2-1-7  | M      | 97             | Lymphoma                           | Hepatitis; spleen red pulp hyperplasia        |
| 85     | M      | 84             | Fibrosarcoma                       | Liver inflammation                            |
| 2-1-4  | F      | 62             | Thymic T-cell lymphoma             | No                                            |
| 1-4-4  | M      | 96             | DLBCL and hepatocellular carcinoma | Mild liver steatosis                          |
| 1-9-15 | M      | 31             | Thymic T-cell lymphoma             | No                                            |
| 2-16   | M      | 91             | Osteosarcoma                       | Liver steatosis                               |
| 63     | F      | 62             | Osteosarcoma and liposarcoma       | Liver steatosis                               |
| 17     | F      | 61             | Fibrosarcoma                       | Mild liver steatosis                          |
| 61-2   | F      | 68             | Lymphoma                           | Mild liver steatosis                          |
| 24     | M      | 36             | Fibrosarcoma                       | Liver inflammation                            |
| 72     | F      | 57             | Squamous cell carcinoma            | Liver inflammation                            |
| 41     | M      | 33             | Lymphoma                           | Liver steatosis                               |
| 1-4-3  | M      | 34             | Squamous cell carcinoma            | Liver inflammation and mild liver steatosis   |
| 2-3    | M      | 64             | Fibrosarcoma                       | Liver inflammation                            |
| 70     | F      | 68             | Osteosarcoma                       | Liver steatosis                               |
| 91     | M      | 74             | Lymphoma                           | Spleen pulp hyperplasia; mild liver steatosis |
| 68     | M      | 67             | Squamous cell carcinoma            | No                                            |
| 84     | M      | 77             | DLBCL                              | DLBCL in liver and spleen; liver steatosis    |
| 2-1-6  | M      | 92             | DLBCL                              | DLBCL in liver, lung and spleen               |
| 53     | F      | 109            | Osteosarcoma                       | No                                            |
| 18     | F      | 48             | Fibrosarcoma                       | Mild liver steatosis                          |
| 80     | M      | 65             | Liposarcoma                        | No                                            |
| 19     | F      | 61             | No                                 | Liver steatosis                               |

DLBCL: Diffuse large B-cell lymphoma; N/A: not applicable; Found dead mice were excluded from tumor study  
*p53*<sup>+/-</sup> mice were from a previously published study (Zhang et al, PNAS, 2014 Dec 30;111(52):18637-42)

**Supplementary Table S4:** *FDXR*<sup>+/-</sup>; *p53*<sup>+/-</sup> mice - survival time, tumor spectrum and other abnormalities (n=29)

| ID       | Gender | Survival (Wks) | Tumor                                                              | Other abnormalities                                                                                                                                                                                                  |
|----------|--------|----------------|--------------------------------------------------------------------|----------------------------------------------------------------------------------------------------------------------------------------------------------------------------------------------------------------------|
| 9-13-8   | F      | 40             | DLBCL                                                              | -                                                                                                                                                                                                                    |
| 7-17-21  | F      | 48             | DLBCL                                                              | Thymic hyperplasia; liver and kidney chronic inflammation                                                                                                                                                            |
| 18       | M      | 25             | T-LBL                                                              | Liver steatosis                                                                                                                                                                                                      |
| 10-21-20 | M      | 42             | Lung papillary adenocarcinoma; DLBCL; benign teratoma              | Atrophic thymus; liver and kidney chronic inflammation; spleen EMH; inflamed dermoid cysts on reproductive organ; chronic sialadenitis                                                                               |
| 8-13-20  | M      | 94             | High grade pleomorphic fibrosarcoma                                | Mild thymic hyperplasia, liver chronic inflammation; spleen hyperplasia/EMH; chronic sialadenitis                                                                                                                    |
| 3-24-25  | M      | 86             | Lymphoma                                                           | Mild thymic hyperplasia; spleen hyperplasia/EMH; lung, liver and kidney chronic inflammation; steatosis; chronic sialadenitis                                                                                        |
| 21       | F      | 73             | Fibrosarcoma; Splenic Follicular lymphoma                          | Thymic hyperplasia; liver chronic inflammation; steatosis; chronic sialadenitis                                                                                                                                      |
| 33       | M      | 57             | Lymphoma                                                           | Mild thymic hyperplasia; spleen hyperplasia/EMH; liver, pancreas and kidney chronic inflammation; atypical follicular hyperplasia in LN; steatosis; chronic sialadenitis                                             |
| 67       | F      | 60             | DLBCL                                                              | Atrophic thymus; liver and kidney chronic inflammation; spleen white pulp atypical follicular hyperplasia/red pulp EMH; chronic sialadenitis                                                                         |
| 71       | F      | 62             | DLBCL                                                              | Spleen EMH; mild steatosis                                                                                                                                                                                           |
| 83       | F      | 56             | DLBCL                                                              | Thymic hyperplasia; chronic sialadenitis; liver necrosis; steatosis                                                                                                                                                  |
| 85       | F      | 61             | DLBCL                                                              | Thymic hyperplasia; spleen hyperplasia/EMH; liver and kidney chronic inflammation; chronic sialadenitis; mild steatosis                                                                                              |
| 56       | F      | 79             | Fibrosarcoma                                                       | Thymic hyperplasia; spleen hyperplasia/EMH; chronic sialadenitis                                                                                                                                                     |
| 35       | M      | 36             | Benign teratoma                                                    | Inflamed dermoid cysts on reproductive organ; thymic and splenic hyperplasia; spleen EMH; chronic sialadenitis                                                                                                       |
| 9-14-33  | F      | 47             | Adenocarcinoma                                                     | Thymic hyperplasia; sialadenitis and reactive follicular hyperplasia; marked periportal inflammation with hepatitis in liver; spleen hyperplasia/EMH, increased gut associated lymphoid follicles; steatosis         |
| 42       | M      | 52             | No                                                                 | Thymic hyperplasia; sialadenitis; marked periportal inflammation with hepatitis in liver; spleen hyperplasia/EMH; increased gut associated lymphoid follicles; reactive follicular hyperplasia in LN                 |
| 4        | F      | 56             | Lymphoma; Pleomorphic sarcoma with angiosarcoma; benign hemangioma | Splenic EMH; mild steatosis                                                                                                                                                                                          |
| 24       | F      | 62             | Pleomorphic sarcoma                                                | Thymic hyperplasia; lung and liver focal perivascular chronic inflammation; spleen EMH                                                                                                                               |
| 5-7-42   | F      | 71             | Pleomorphic sarcoma with angiosarcoma                              | Thymic hyperplasia; liver focal perivascular chronic inflammation; spleen follicular hyperplasia/EMH; pulmonary venous vasculopathy with peribronchitis; sialadenitis; reactive lymphoid hyperplasia; mild steatosis |
| 90       | M      | 71             | Hepatocellular carcinoma; Histiocytic sarcoma                      | Liver necrosis; pulmonary venous vasculopathy with peribronchitis                                                                                                                                                    |
| 27       | M      | 84             | Squamous cell carcinoma; Osteosarcoma                              | Spleen follicular hyperplasia/EMH; steatosis                                                                                                                                                                         |
| 69       | F      | 50             | Squamous cell carcinoma                                            | Thymic hyperplasia; liver and kidney chronic inflammation; spleen follicular hyperplasia/EMH; sialadenitis                                                                                                           |
| 52       | F      | 52             | DLBCL                                                              | Thymic hyperplasia; liver and kidney focal chronic inflammation; spleen follicular hyperplasia/EMH; sialadenitis                                                                                                     |
| 74       | M      | 74             | Fibrosarcoma; Basaloid squamous cell carcinoma                     | Spleen follicular hyperplasia/EMH                                                                                                                                                                                    |
| 63       | F      | 72             | DLBCL                                                              | Liver steatohepatitis                                                                                                                                                                                                |
| 22       | F      | 72             | N/A                                                                | Found dead                                                                                                                                                                                                           |
| 15       | F      | 70             | N/A                                                                | Found dead                                                                                                                                                                                                           |
| 26       | F      | 73             | N/A                                                                | Found dead                                                                                                                                                                                                           |
| 59       | M      | 81             | N/A                                                                | Found dead                                                                                                                                                                                                           |

T-LBL: T-cell lymphoblastic lymphoma; DLBCL: Diffuse large B-cell lymphoma; EMH: extramedullary hematopoiesis

**Supplementary Table S5.** Complete Blood Count (CBC) in WT, *Fdxx<sup>+/-</sup>*, *Trp53<sup>+/-</sup>* and *Fdxx<sup>+/-</sup>;Trp53<sup>+/-</sup>* mice

**A.** The levels of RBC, RDW, Hemoglobin and Hematocrit in WT, *Fdxx<sup>+/-</sup>*, *Trp53<sup>+/-</sup>* or *Fdxx<sup>+/-</sup>;Trp53<sup>+/-</sup>* mice

|                                                     | RBC<br>(M/ $\mu$ L) | RDW<br>(%)       | Hemoglobin<br>(g/dL) | Hematocrit<br>(%) |
|-----------------------------------------------------|---------------------|------------------|----------------------|-------------------|
| WT (n=5)                                            | 10.14 $\pm$ 0.22    | 21.00 $\pm$ 2.50 | 12.95 $\pm$ 0.65     | 42.55 $\pm$ 0.65  |
| <i>Fdxx<sup>+/-</sup></i> (n=5)                     | 10.05 $\pm$ 0.16    | 18.04 $\pm$ 0.13 | 13.40 $\pm$ 0.26     | 42.50 $\pm$ 0.96  |
| <i>Trp53<sup>+/-</sup></i> (n=5)                    | 10.09 $\pm$ 0.37    | 19.05 $\pm$ 1.18 | 13.48 $\pm$ 0.43     | 42.85 $\pm$ 1.61  |
| <i>Fdxx<sup>+/-</sup>;Trp53<sup>+/-</sup></i> (n=5) | 9.61 $\pm$ 0.16     | 18.19 $\pm$ 0.24 | 12.99 $\pm$ 0.25     | 41.51 $\pm$ 0.80  |

RBC: Red Blood Cell; RDW: Red cell Distribution Width

**B.** The levels of MCV, MCH, MCHC, Platelets and MPV in WT, *Fdxx<sup>+/-</sup>*, *Trp53<sup>+/-</sup>* or *Fdxx<sup>+/-</sup>;Trp53<sup>+/-</sup>* mice

|                                                     | MCV<br>(fL)      | MCH<br>(pg)      | MCHC<br>(g/dL)   | Platelets<br>(K/ $\mu$ L) | MPV<br>(fL)     |
|-----------------------------------------------------|------------------|------------------|------------------|---------------------------|-----------------|
| WT (n=5)                                            | 41.95 $\pm$ 0.25 | 12.75 $\pm$ 0.35 | 30.45 $\pm$ 1.05 | 1894.00 $\pm$ 33.00       | 5.45 $\pm$ 0.05 |
| <i>Fdxx<sup>+/-</sup></i> (n=5)                     | 42.30 $\pm$ 0.75 | 13.32 $\pm$ 0.20 | 31.52 $\pm$ 0.21 | 1479.40 $\pm$ 79.82       | 5.40 $\pm$ 0.11 |
| <i>Trp53<sup>+/-</sup></i> (n=5)                    | 42.20 $\pm$ 0.54 | 13.35 $\pm$ 0.26 | 31.48 $\pm$ 0.32 | 1560.75 $\pm$ 443.97      | 5.45 $\pm$ 0.16 |
| <i>Fdxx<sup>+/-</sup>;Trp53<sup>+/-</sup></i> (n=5) | 43.22 $\pm$ 0.44 | 13.52 $\pm$ 0.15 | 31.30 $\pm$ 0.40 | 1558.44 $\pm$ 136.66      | 5.49 $\pm$ 0.09 |

MCV: Mean Corpuscular Volume; MCH: Mean Corpuscular Hemoglobin;  
MCHC: Mean Corpuscular Hemoglobin Concentration; MPV: Mean Platelet Volume

**C.** The levels of Neutrophil, Lymphocyte, Monocyte, Eosinophil and Basophil in WT, *Fdxx<sup>+/-</sup>*, *Trp53<sup>+/-</sup>* and *Fdxx<sup>+/-</sup>;Trp53<sup>+/-</sup>* mice

|                                                     | WBC (K/ $\mu$ L) | WBC (100%)        |                   |                 |                 |                 |
|-----------------------------------------------------|------------------|-------------------|-------------------|-----------------|-----------------|-----------------|
|                                                     |                  | Neutrophil (%)    | Lymphocyte (%)    | Monocyte (%)    | Eosinophil (%)  | Basophil (%)    |
| WT (n=5)                                            | 5.77 $\pm$ 1.63  | 58.04 $\pm$ 17.82 | 37.30 $\pm$ 13.10 | 2.86 $\pm$ 0.15 | 1.18 $\pm$ 0.31 | 0.64 $\pm$ 0.37 |
| <i>Fdxx<sup>+/-</sup></i> (n=5)                     | 3.72 $\pm$ 0.78  | 34.83 $\pm$ 6.97  | 57.69 $\pm$ 6.34  | 5.68 $\pm$ 1.02 | 1.52 $\pm$ 0.75 | 0.55 $\pm$ 0.32 |
| <i>Trp53<sup>+/-</sup></i> (n=5)                    | 4.97 $\pm$ 0.99  | 37.43 $\pm$ 10.73 | 56.57 $\pm$ 10.22 | 3.91 $\pm$ 0.77 | 1.54 $\pm$ 0.42 | 0.56 $\pm$ 0.49 |
| <i>Fdxx<sup>+/-</sup>;Trp53<sup>+/-</sup></i> (n=5) | 4.54 $\pm$ 1.51  | 41.74 $\pm$ 5.22  | 54.92 $\pm$ 4.26  | 4.88 $\pm$ 0.46 | 1.42 $\pm$ 0.46 | 0.36 $\pm$ 0.29 |

**Supplementary Table S6.** The oligos used for generation of sgRNA expression vectors

| Name               | Sequence                                                                              |
|--------------------|---------------------------------------------------------------------------------------|
| Human p53 sgRNA#1  | Sense: 5'-caccgACTGGGACGGAACAGCTTTG3'<br>Antisense: 5'-aaacCAAAGCTGTTCCGTCCCAGTc-3'   |
| Human p53 sgRNA#2  | Sense: 5'-caccgTCTGTGCGCCGGTCTCTCCC-3'<br>Antisense: 5'-aaacGGGAGAGACCGGCGCACAGAc-3'  |
| Human FDXR sgRNA#1 | Sense: 5'- caccgCCTTCGTGGGCTGGTACAAC-3'<br>Antisense: 5'-aaacGTTGTACCAGCCCACGAAGGc-3' |
| Human FDXR sgRNA#2 | Sense: 5'-caccgCCGCCTAGCAGTCACTAGAC-3'<br>Antisense: 5'-aaacGTCTAGTGACTGCTAGGCGGc-3'  |

**Supplementary Table S7.** The primers used for mouse and cell lines genotyping

| Name                                          | Sequence                                                                                                                 |
|-----------------------------------------------|--------------------------------------------------------------------------------------------------------------------------|
| <i>Fdxr</i> -KO<br>mouse genotyping           | Sense: 5'-GGCATCTGGAGGTACTAGGAAG-3'<br>Antisense: 5'-AGTTGCTGGCTTGGTCTGTCTG-3'<br>Antisense: 5'-CCCCACAGAACTCTATTGCTC-3' |
| <i>Trp53</i> -KO<br>mouse genotyping          | Sense: 5'-ACGCCAGACTTTGCTGAGTT-3'<br>Antisense: 5'-GAGGAGCCAGGAGAGGACTT-3'<br>Antisense: 5'-CGATGATGTGGCTTTGAAGA-3'      |
| Human <i>FDXR</i> -KO<br>cell line genotyping | Sense: 5'-AGGGACAGCCTGGAGACATT-3'<br>Antisense: 5'-GGGGTGTCTTTGGGAAACAT-3'                                               |

**Supplementary Table S8. siRNA Oligonucleotides**

| Name            | Sequence                                                               |
|-----------------|------------------------------------------------------------------------|
| Scrambled siRNA | 5'-GCAGUGUCUCCACGUACUAdTd-3'                                           |
| siFDXR-human    | #1: 5'-CACCAUUAAGGAGCUUCGGdTdT-3'<br>#2: 5'-GCUCAGCAGCAUUGGGUAUdTdT-3' |
| siip53-human    | #1: 5'-GAAAUUUGCGUGUGGAGUAdTdT-3'<br>#2: 5'-GCACAGAGGAAGAGAAUCUdTdT-3' |
